# Supplementary material for: Valorization of Bilberry (Vaccinium myrtillus L.) Pomace by Enzyme-Assisted Extraction: Process Optimization and Comparison with Conventional Solid-Liquid Extraction
Source: MDPI journal article supplement (doi:10.3390/antiox10050773), 2021-05-13
Supplement: s1 [file s1]

# Valorization of bilberry (*Vaccinium myrtillus* L.) pomace by enzyme-assisted extraction: process optimization and comparison with conventional solid-liquid extraction

Michail Syrpas <sup>1,2\*</sup>, Egle Valanciene <sup>2</sup>, Ernesta Augustiniene <sup>2</sup> and Naglis Malys <sup>2\*</sup>

<sup>1</sup> Department of Food Science & Technology, Faculty of Chemical Technology, Kaunas University of Technology, Radvilėnų pl. 19, LT-50254 Kaunas, Lithuania; michail.syrpas@ktu.lt (M.S.)

<sup>2</sup> Bioprocess Research Centre, Faculty of Chemical Technology, Kaunas University of Technology, Radvilėnų pl. 19, Kaunas LT-50254, Lithuania; egle.valanciene@ktu.lt (E.V.); ernesta.augustiniene@ktu.lt (E.A); naglis.malys@ktu.lt (N.M)

\* Correspondence: michail.syrpas@ktu.lt; naglis.malys@ktu.lt; Tel.: (+37062341846)

## Supplementary Tables

Table S1. Analysis of variance of the regression parameters for EAE response surface quadratic model of bilberry pomace for the response factors extract yield (g/100 g of residue after SFE-CO<sub>2</sub>), TEAC<sub>ABTS</sub> and total phenolic content (mg GAE/g of residue after SFE-CO<sub>2</sub>)

| Source                                                                       | Sum of Squares | df | Mean Square | F-value | p-value  |    |
|------------------------------------------------------------------------------|----------------|----|-------------|---------|----------|----|
| <b>RF I: EAE extract yield (g/100 g of Residue after SFE-CO<sub>2</sub>)</b> |                |    |             |         |          |    |
| Model                                                                        | 119.92         | 11 | 10.9        | 13.95   | < 0.0001 | *  |
| A-Ph                                                                         | 5.63           | 1  | 5.63        | 7.2     | 0.0163   | *  |
| B-Temperature (T, °C)                                                        | 2.81           | 1  | 2.81        | 3.6     | 0.0759   | *  |
| C-Time (τ, hours)                                                            | 4.83           | 1  | 4.83        | 6.18    | 0.0244   | *  |
| D-Enzyme load (AU/g)                                                         | 9.31           | 1  | 9.31        | 11.91   | 0.0033   | *  |
| AC                                                                           | 8.87           | 1  | 8.87        | 11.35   | 0.0039   | *  |
| AD                                                                           | 2.33           | 1  | 2.33        | 2.98    | 0.1038   | ** |
| BC                                                                           | 4.26           | 1  | 4.26        | 5.45    | 0.0329   | *  |
| BD                                                                           | 3.56           | 1  | 3.56        | 4.56    | 0.0486   | *  |
| A <sup>2</sup>                                                               | 33.97          | 1  | 33.97       | 43.46   | < 0.0001 | *  |
| B <sup>2</sup>                                                               | 6.3            | 1  | 6.3         | 8.06    | 0.0119   | *  |
| C <sup>2</sup>                                                               | 4.5            | 1  | 4.5         | 5.75    | 0.029    | *  |
| Residual                                                                     | 12.5           | 16 | 0.7815      |         |          |    |
| Lack of Fit                                                                  | 8.85           | 13 | 0.6811      | 0.5599  | 0.8006   | ** |
| Pure Error                                                                   | 3.65           | 3  | 1.22        |         |          |    |
| Cor Total                                                                    | 132.43         | 27 |             |         |          |    |
| <b>RF II: TEAC<sub>ABTS</sub> (mg TE/ g Extract)</b>                         |                |    |             |         |          |    |
| Model                                                                        | 119.92         | 11 | 10.9        | 13.95   | < 0.0001 | *  |
| A-Ph                                                                         | 5.63           | 1  | 5.63        | 7.2     | 0.0163   | *  |
| B-Temperature (T, °C)                                                        | 2.81           | 1  | 2.81        | 3.6     | 0.0759   | *  |
| C-Time (τ, hours)                                                            | 4.83           | 1  | 4.83        | 6.18    | 0.0244   | *  |
| D-Enzyme load (AU/g)                                                         | 9.31           | 1  | 9.31        | 11.91   | 0.0033   | *  |
| AC                                                                           | 8.87           | 1  | 8.87        | 11.35   | 0.0039   | *  |
| AD                                                                           | 2.33           | 1  | 2.33        | 2.98    | 0.1038   | ** |
| BC                                                                           | 4.26           | 1  | 4.26        | 5.45    | 0.0329   | *  |
| BD                                                                           | 3.56           | 1  | 3.56        | 4.56    | 0.0486   | *  |

|                                        |        |    |        |        |          |    |
|----------------------------------------|--------|----|--------|--------|----------|----|
| A <sup>2</sup>                         | 33.97  | 1  | 33.97  | 43.46  | < 0.0001 | *  |
| B <sup>2</sup>                         | 6.3    | 1  | 6.3    | 8.06   | 0.0119   | *  |
| C <sup>2</sup>                         | 4.5    | 1  | 4.5    | 5.75   | 0.029    | *  |
| Residual                               | 12.5   | 16 | 0.7815 |        |          |    |
| Lack of Fit                            | 8.85   | 13 | 0.6811 | 0.5599 | 0.8006   | ** |
| Pure Error                             | 3.65   | 3  | 1.22   |        |          |    |
| Cor Total                              | 132.43 | 27 |        |        |          |    |
| <b>RF III: TPC (mg GAE/ g extract)</b> |        |    |        |        |          |    |
| Model                                  | 18.73  | 10 | 1.87   | 13.81  | < 0.0001 | *  |
| A-Ph                                   | 1.32   | 1  | 1.32   | 9.76   | 0.0062   | *  |
| B-Temperature (T, °C)                  | 0.1061 | 1  | 0.1061 | 0.7818 | 0.3889   | ** |
| C-Time (τ, hours)                      | 2.98   | 1  | 2.98   | 21.96  | 0.0002   | *  |
| D-Enzyme load (AU/g)                   | 0.0109 | 1  | 0.0109 | 0.0805 | 0.78     | ** |
| AB                                     | 1.13   | 1  | 1.13   | 8.32   | 0.0103   | *  |
| AC                                     | 2.62   | 1  | 2.62   | 19.3   | 0.0004   | *  |
| BC                                     | 4.25   | 1  | 4.25   | 31.35  | < 0.0001 | *  |
| CD                                     | 0.3436 | 1  | 0.3436 | 2.53   | 0.13     | ** |
| B <sup>2</sup>                         | 1.23   | 1  | 1.23   | 9.03   | 0.008    | *  |
| D <sup>2</sup>                         | 0.6655 | 1  | 0.6655 | 4.9    | 0.0407   | *  |

\*: significant; \*\*: not significant; EAE: enzyme-assisted extraction; RF: response factor; SFE-CO<sub>2</sub>: supercritical carbon dioxide extraction; SS: the sum of square; df: the degree of freedom; MS: mean square; F: Fisher value; GAE: gallic acid equivalents; TPC: total phenolic content.

Table S2. Fit statistics for the proposed models

|                          | RF I   | RF II  | RF III |
|--------------------------|--------|--------|--------|
| St. Dev.                 | 0.54   | 0.88   | 0.37   |
| Mean                     | 55.08  | 36.26  | 11.35  |
| C.V. (%)                 | 0.99   | 2.44   | 3.25   |
| R <sup>2</sup>           | 0.9736 | 0.9056 | 0.8904 |
| Adjusted R <sup>2</sup>  | 0.9525 | 0.8407 | 0.8259 |
| Predicted R <sup>2</sup> | 0.9030 | 0.7331 | 0.7658 |
| Adeq Precision           | 24.39  | 16.31  | 12.76  |

St. Dev: standard deviation, C.V.: coefficient of variation, RF I: EAE extract yield (g/100 g of residue after SFE-CO<sub>2</sub>), RF II: TEACABTS (mg TE/ g extract), RF III: TPC (mg GAE/ g extract)

Table S3 Coefficients in terms of coded factors for the proposed models

| Factor                                                                  | CE      | df | SE     | 95% CI low | 95% CI High | VIF |
|-------------------------------------------------------------------------|---------|----|--------|------------|-------------|-----|
| RF I: EAE extract yield (g/100 g of residue after SFE-CO <sub>2</sub> ) |         |    |        |            |             |     |
| Intercept                                                               | 57.15   | 1  | 0.1821 | 56.76      | 57.54       |     |
| A-ph                                                                    | 0.7034  | 1  | 0.1283 | 0.4298     | 0.9769      | 1   |
| B-Temperature                                                           | 0.6771  | 1  | 0.1283 | 0.4036     | 0.9507      | 1   |
| C-Time                                                                  | 0.3847  | 1  | 0.1283 | 0.1111     | 0.6582      | 1   |
| D-Enzyme load                                                           | 1.62    | 1  | 0.1283 | 1.35       | 1.9         | 1   |
| AB                                                                      | 0.4108  | 1  | 0.1361 | 0.1207     | 0.7009      | 1   |
| AC                                                                      | -0.6046 | 1  | 0.1361 | -0.8948    | -0.3145     | 1   |
| AD                                                                      | -0.4195 | 1  | 0.1361 | -0.7096    | -0.1294     | 1   |
| BC                                                                      | 0.3578  | 1  | 0.1361 | 0.0677     | 0.6479      | 1   |
| BD                                                                      | -0.9113 | 1  | 0.1361 | -1.2       | -0.6212     | 1   |
| CD                                                                      | 0.9072  | 1  | 0.1361 | 0.6171     | 1.2         | 1   |
| A <sup>2</sup>                                                          | -1.95   | 1  | 0.2963 | -2.59      | -1.32       | 1.9 |

|                                                |         |   |        |         |         |      |
|------------------------------------------------|---------|---|--------|---------|---------|------|
| B <sup>2</sup>                                 | -1.27   | 1 | 0.2963 | -1.9    | -0.641  | 1.9  |
| RF II: TEAC <sub>ABTS</sub> (mg TE/ g extract) |         |   |        |         |         |      |
| Intercept                                      | 34.17   | 1 | 0.3022 | 33.53   | 34.81   |      |
| A-ph                                           | 0.5593  | 1 | 0.2084 | 0.1176  | 1       | 1    |
| B-Temperature                                  | 0.3954  | 1 | 0.2084 | -0.0463 | 0.8371  | 1    |
| C-Time                                         | -0.5178 | 1 | 0.2084 | -0.9596 | -0.0761 | 1    |
| D-Enzyme load                                  | -0.7191 | 1 | 0.2084 | -1.16   | -0.2774 | 1    |
| AC                                             | -0.7446 | 1 | 0.221  | -1.21   | -0.276  | 1    |
| AD                                             | -0.3813 | 1 | 0.221  | -0.8498 | 0.0873  | 1    |
| BC                                             | -0.516  | 1 | 0.221  | -0.9846 | -0.0475 | 1    |
| BD                                             | -0.4718 | 1 | 0.221  | -0.9404 | -0.0033 | 1    |
| A <sup>2</sup>                                 | 3.47    | 1 | 0.5268 | 2.36    | 4.59    | 2.28 |
| B <sup>2</sup>                                 | -1.5    | 1 | 0.5268 | -2.61   | -0.3787 | 2.28 |
| C <sup>2</sup>                                 | 1.26    | 1 | 0.5268 | 0.1469  | 2.38    | 2.28 |
| RF III: TPC (mg GAE/ g extract)                |         |   |        |         |         |      |
| Intercept                                      | 10.68   | 1 | 0.1232 | 10.42   | 10.94   |      |
| A-ph                                           | 0.2713  | 1 | 0.0868 | 0.0881  | 0.4545  | 1    |
| B-Temperature                                  | -0.0768 | 1 | 0.0868 | -0.26   | 0.1064  | 1    |
| C-Time                                         | -0.4069 | 1 | 0.0868 | -0.5901 | -0.2237 | 1    |
| D-Enzyme load                                  | 0.0246  | 1 | 0.0868 | -0.1585 | 0.2078  | 1    |
| AB                                             | -0.2656 | 1 | 0.0921 | -0.4599 | -0.0713 | 1    |
| AC                                             | -0.4045 | 1 | 0.0921 | -0.5988 | -0.2103 | 1    |
| BC                                             | -0.5156 | 1 | 0.0921 | -0.7099 | -0.3213 | 1    |
| CD                                             | 0.1466  | 1 | 0.0921 | -0.0477 | 0.3408  | 1    |
| B <sup>2</sup>                                 | 0.6024  | 1 | 0.2004 | 0.1795  | 1.03    | 1.9  |
| D <sup>2</sup>                                 | 0.4439  | 1 | 0.2004 | 0.021   | 0.8667  | 1.9  |

CE: coefficient estimate, df: degrees of freedom; SE: standard error, CI: confidence interval, VIF: Variance inflation factor

Table S4. Validation of predictive models

| RF                         | Predicted Mean | Predicted Median | Std Dev | n    | SE Pred | 95% PI Low | Data Mean | 95% PI high |
|----------------------------|----------------|------------------|---------|------|---------|------------|-----------|-------------|
| RFI: Yield                 | 56.83          | 56.83            | 0.54    | 3.00 | 0.45    | 55.87      | 56.15     | 57.79       |
| RFII: TEAC <sub>ABTS</sub> | 38.68          | 38.68            | 0.88    | 3.00 | 0.77    | 37.05      | 37.82     | 40.31       |
| RFIII: TPC                 | 12.39          | 12.39            | 0.37    | 3.00 | 0.31    | 11.73      | 12.15     | 13.05       |

RF I: EAE extract yield (g/100 g of residue after SFE-CO<sub>2</sub>), RF II: TEAC<sub>ABTS</sub> (mg TE/ g extract), RF III: TPC (mg GAE/ g extract)

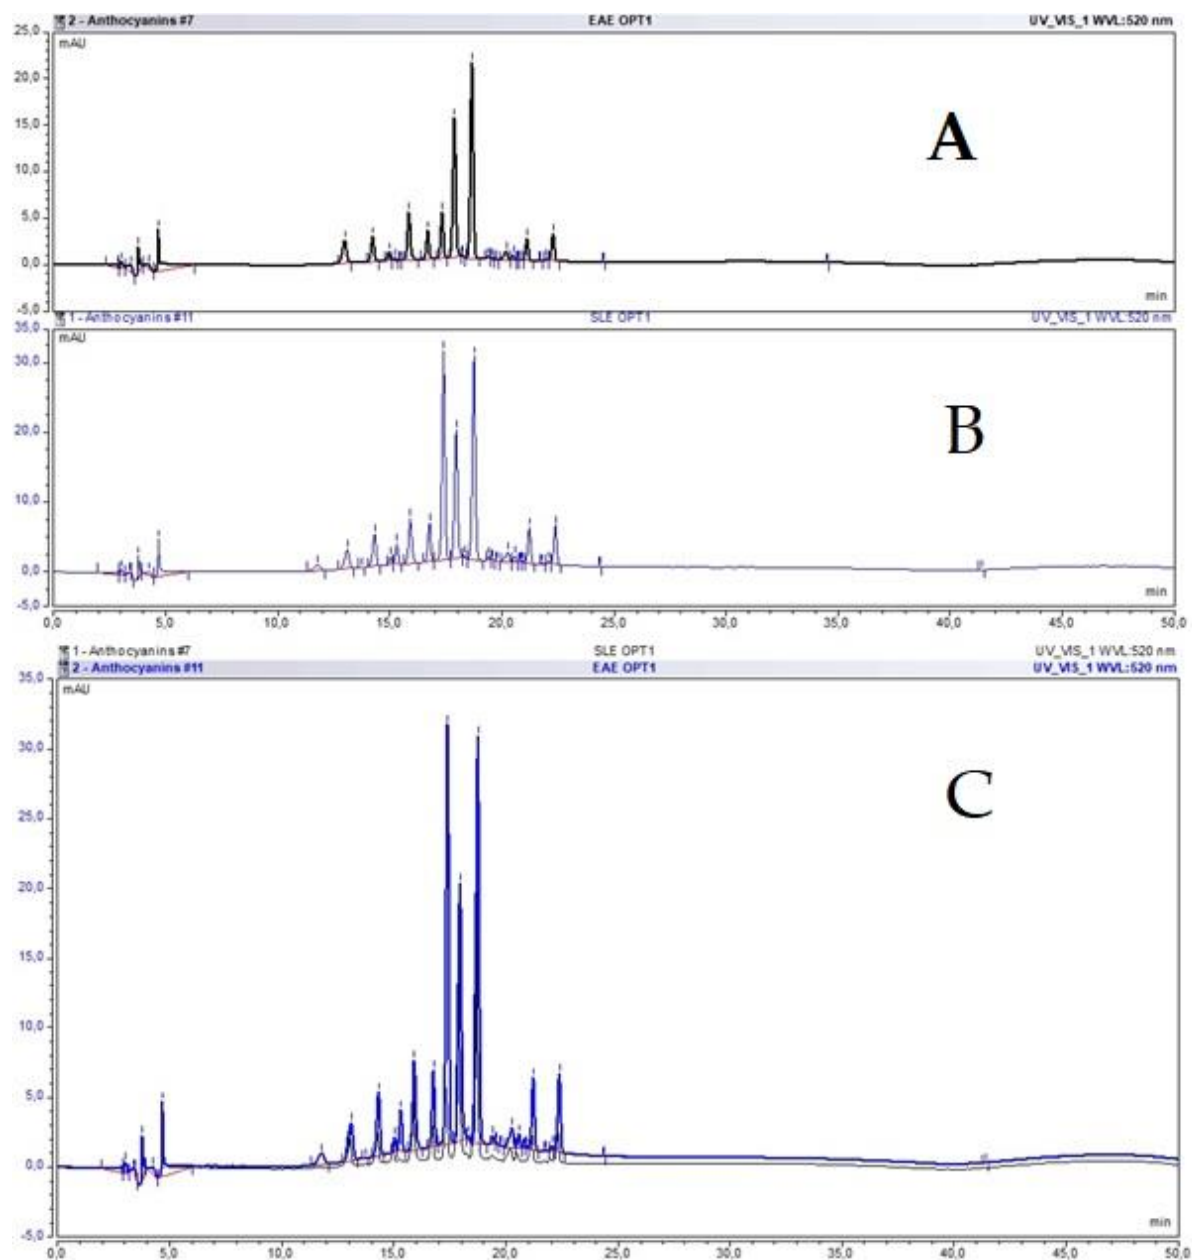

Figure 1. HPLC chromatograms at 520 nm of SLE and EAE extracts under optimal conditions. (A) EAE extract (B) SLE extract, and (C) overlaid chromatograms.
